# Supplementary material for: Realization of high-performance room temperature solid state Li-metal batteries using a LiF/PVDF-HFP composite membrane for protecting an LATP ceramic electrolyte
Source: Royal Society of Chemistry journal article supplement (doi:10.1039/d3ta00331k), 2023-01-01
Supplement: d3ta00331k1.pdf [file d3ta00331k1.pdf]

## Supporting Information

### **Realization of High-Performance Room Temperature Solid State Li-Metal Batteries using LiF/PVDF-HFP Composite Membrane Protecting LATP Ceramic Electrolyte**

Mahmoud Ghafari,<sup>a</sup> Zeinab Sanaee,<sup>\*a</sup> Alireza Babaei<sup>b</sup> and Shams Mohajerzadeh<sup>c</sup>

<sup>a</sup> Energy Storage Laboratory, Department of Electrical and Computer engineering, College of Engineering, University of Tehran, Tehran, Iran.

<sup>b</sup> Department of Metallurgy and Materials Engineering, College of Engineering, University of Tehran, Tehran, Iran.

<sup>c</sup> Department of Electrical and Computer engineering, College of Engineering, University of Tehran, Tehran, Iran.

E-mail: [z.sanaee@ut.ac.ir](mailto:z.sanaee@ut.ac.ir)

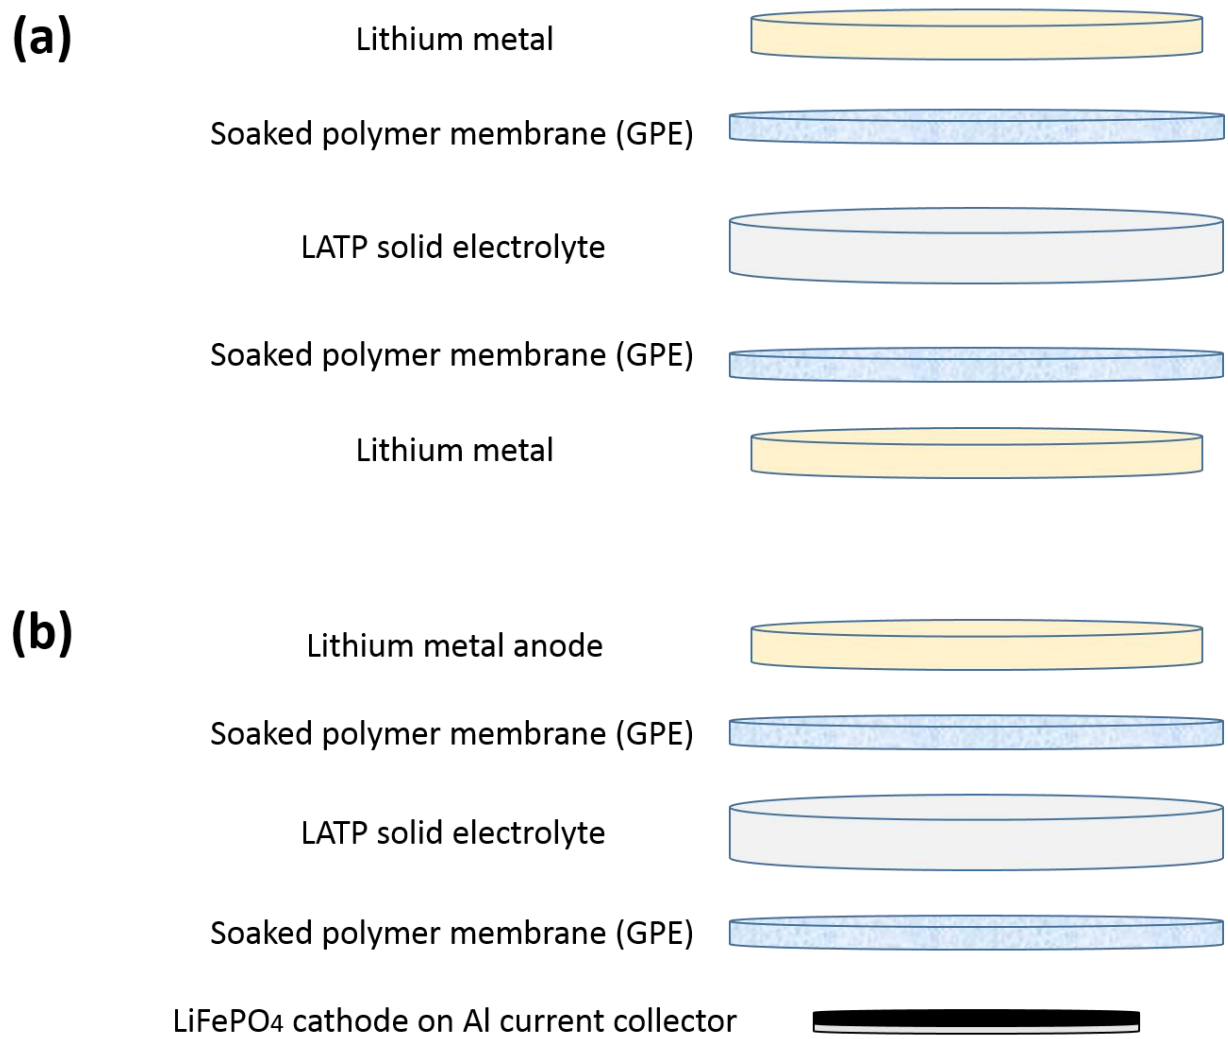

**Fig. S1** Configuration of (a) symmetric cell and (b) full cell.

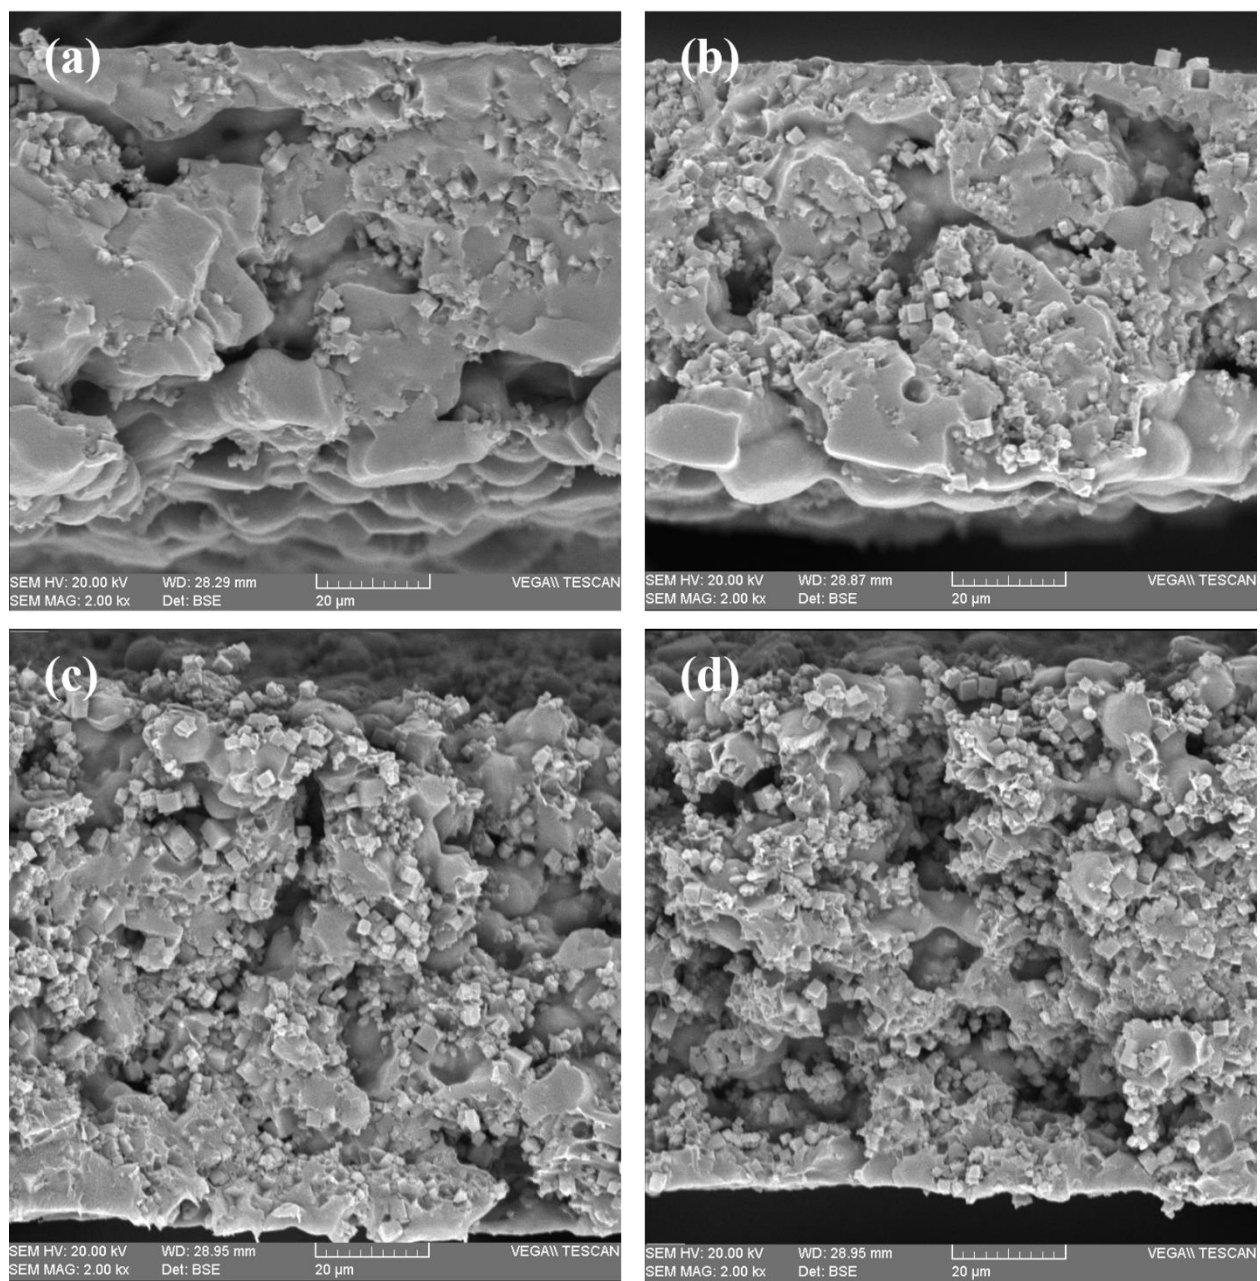

**Fig. S2** Backscattered electron images of the synthesized GPEs. (a) GPE25, (b) GPE50, (c) GPE75, and (d) GPE100.

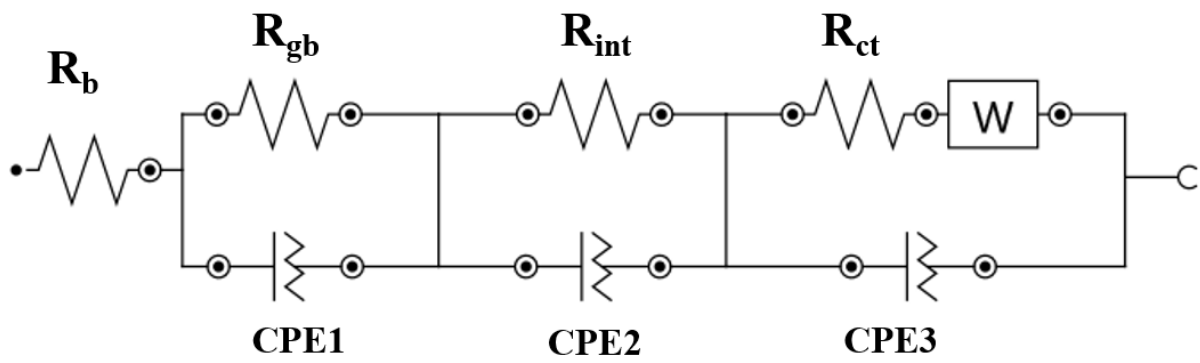

**Fig. S3** Equivalent circuit for the symmetric cells and full cell

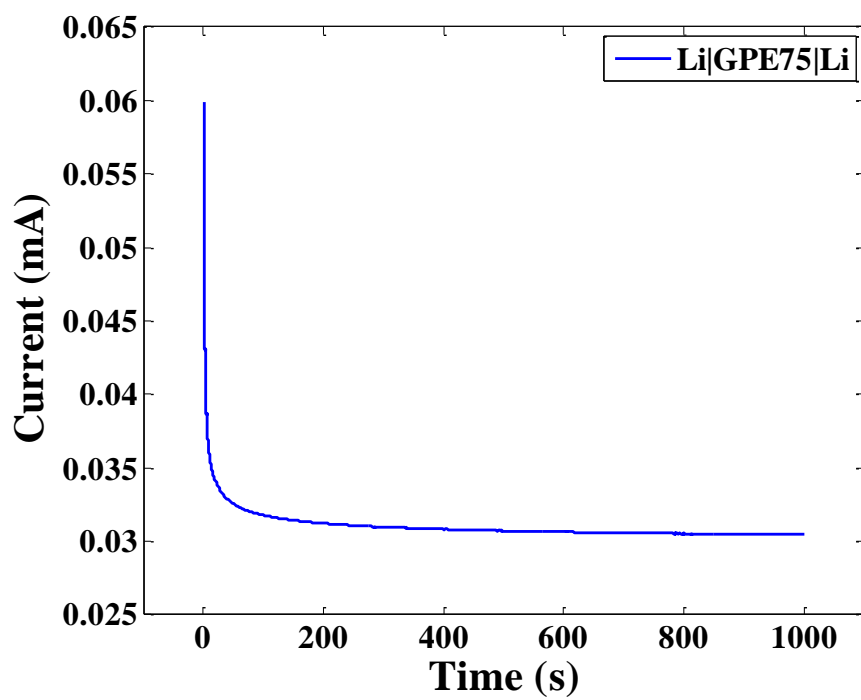

**Fig. S4** Chronoamperometry curves of Li|GPE75|Li cell at 10mV DC polarization.

$$I_0 = 59.8 \mu\text{A} - I_{\text{Steady State}} = 30.4 \mu\text{A}$$

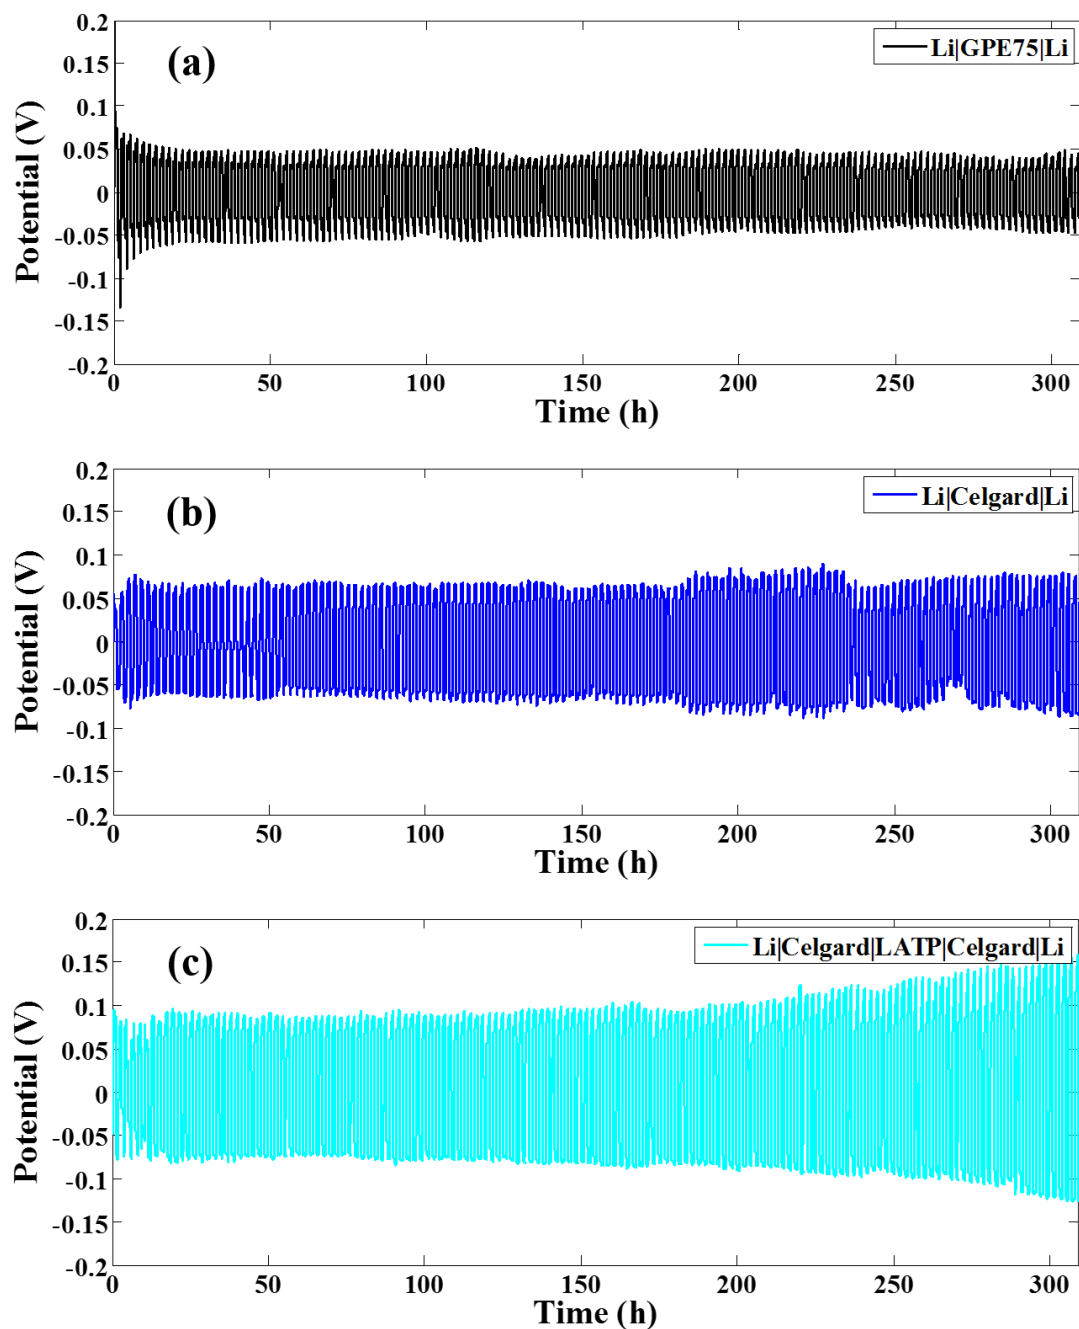

**Fig. S5** Voltage profile of the (a) Li|GPE75|Li, (b) Li|Celgard|Li, and (c) Li|Celgard|LATP|Celgard|Li symmetric cells after 300 h of cycling. The Li|GPE75|Li cell showed stable operation with the lowest over-potential of about 50 mV at the last cycles. The situation is almost similar for the cell with a commercial celgard separator, except that the over-potential is slightly higher (about 75 mV). In contrast, the over-potential of the Li|Celgard|LATP|Celgard|Li cell started to increase after  $t=150$  h and reached 125 mV at  $t=300$  h, which implies the relatively poor protection capability of the Celgard compared to GPE75.
